# Supplementary material for: Ethanol and KOH co-pretreatment towards ultra-high specific surface area carbons for high-rate and high-energy supercapacitors
Source: Royal Society of Chemistry journal article supplement (doi:10.1039/d0cc06187e), 2020-01-01
Supplement: d0cc06187e1.pdf [file d0cc06187e1.pdf]

## Supporting Information

# Ethanol and KOH co-pretreatment towards ultra-high specific surface area carbons for high-rate and high-energy supercapacitors

### 2. Materials and Methods

#### 2.1 Materials

Ethanol (99.9%), EMIMBF<sub>4</sub> (99 wt. %), and hydrochloric acid (36.0-38.0 wt. %), were purchased from Sigma-Aldrich Co. LLC. Pitaya peels were obtained from fruits supermarket. Potassium hydroxide (KOH, 99.9 wt. %) and Sodium sulphate (99.9 wt. %) were got from Macklin Inc. All the agents were analytical pure and used as received without further purification. The water used in the experiments was deionized (Milipore Mili-Q grade) with resistivity of 18.0 MΩ•cm.

#### 2.2 Characterization

X-ray diffraction (XRD) patterns was collected by a X-ray diffraction (DX-2700,  $\lambda = 1.5406 \text{ \AA}$ ). For the BET measurement, a Micromeritics Tristar 3020 instrument was used to evaluate the specific surface areas of the obtained carbons. All samples were dried at 80 °C in a vacuum oven for 12 h, following by degassing at 150 °C for 12 h. The morphology and structure of the products were observed on scanning electron microscope (SEM, Sigma 500/VP, the accelerate voltage was 5 kV) and transmission electron microscope (TEM, JEM-100SX, the accelerate voltage was 200 kV). X-ray photoelectron spectroscopic (XPS) measurements were carried out using X-ray photoelectron spectrometer (ESCALAB 250Xi, Thermo, USA). Raman and flourier transform infrared (FT-IR) spectra were obtained from Raman microspectrometer (Dilor LABRAM-1B) with an excitation wavelength of 532 nm and NEXUS-870 FTIR spectrometer (KBr pellet technique), respectively.

#### 2.3 Materials synthesis

The pitaya peels were carefully washed with DI water to remove impurities and then annealed in a tube furnace at 400 °C in N<sub>2</sub> atmosphere for 2 h to obtain the carbon precursors. Afterwards the carbon precursors were mixed with KOH as the mass ratio of 1:2, 1:3, and 1:4 by adding 80 ml of different solutions (water, 60 vol. %, 70 vol. %, and 80 vol. % ethanol aqueous solution) in 100 ml beakers, respectively. Then the as-prepared blends were sonicated for 30 min to form the uniform suspensions. After that, all blends were heated to 100 °C in an oven over night to procure dry pre-treated carbon precursors. Subsequently, the pre-treated carbon precursors were activated in the tube furnace at 400 °C for 1.5 h and further calcinated at 850, 900, and 950 °C respectively under N<sub>2</sub> maintaining for 2 h. After cooling down to room temperature naturally, the activated carbons were washed with DI water to pH 7.0 firstly and neutralized by 1 M HCl solution, further washing with DI water to pH 7.0. The final products were obtained after drying in an oven at 80 °C for hole night, which were named as WPPC and EPPC-1 to 7 individually (The details could be found in Table S1 ).

#### 2.4 Electrochemical measurements

The electrochemical energy storage properties of the samples were measured in a three-electrode system with 6 M KOH electrolyte solution on CHI-660E, embracing Galvanostatic charge-discharge (GCD), cyclic voltammetry (CV), and electrochemical impedance spectroscopy (EIS). The active materials, acetylene black and polyvinylidene fluoride (PVDF) in a weight ratio of 8:1:1 were prepared as work electrode into N-Methyl pyrrolidone (NMP). After that, the slurry was painted onto nickel foam and dry at 80 °C for 12 h. The mass loading of each electrode was ca. 1 mg•cm<sup>-2</sup>. Ag/AgCl electrode and Pt foil (1×1 cm) were employed as reference electrode and counter electrode, particularly. The specific capacitances of samples were calculated by GCD patterns according to the formulation as follow:

$$C_g = \frac{I \times \Delta t}{m \times \Delta U_{(1)}}$$

where C<sub>g</sub> (F•g<sup>-1</sup>), I (A),  $\Delta t$  (s), m (g), and  $\Delta U$  (V) refer to specific capacitance, constant current, discharge time, the mass of active materials, and discharge potential excluding the IR drop, respectively.

The two-electrode symmetric supercapacitor (SC) devices were assembled to CR 2016 coin-type cell by using 6 M KOH, 1 M Na<sub>2</sub>SO<sub>4</sub>, and EMIMBF<sub>4</sub> as electrolytes individually at ambient temperature in a glove box. GCD and CV curves were conducted by using a CHI660E electrochemical workstation at room temperature.

The electrochemical capacitance was calculated using eqn (2):

$$C_s = 4C_{\text{cell}} = \frac{4 \times I \times \Delta t}{m \times \Delta V} \quad (2)$$

where  $C_s$  (F•g<sup>-1</sup>) represents the specific capacitance of single electrode,  $C_{\text{cell}}$  (F•g<sup>-1</sup>) represents the device capacitance,  $I$  (A),  $\Delta t$  (s), and  $\Delta V$  (V) have the same definition as in eqn (1), and  $m$  (g) is the total mass of the active materials in the two electrodes.

The energy density ( $E$ , W h•kg<sup>-1</sup>) and power density ( $P$ , W•kg<sup>-1</sup>) of all devices were conducted by eqn (3) and eqn (4):

$$E = \frac{1}{7.2} C_{\text{cell}} \Delta V^2 \quad (3)$$

$$P = \frac{E \times 3600}{\Delta t} \quad (4)$$

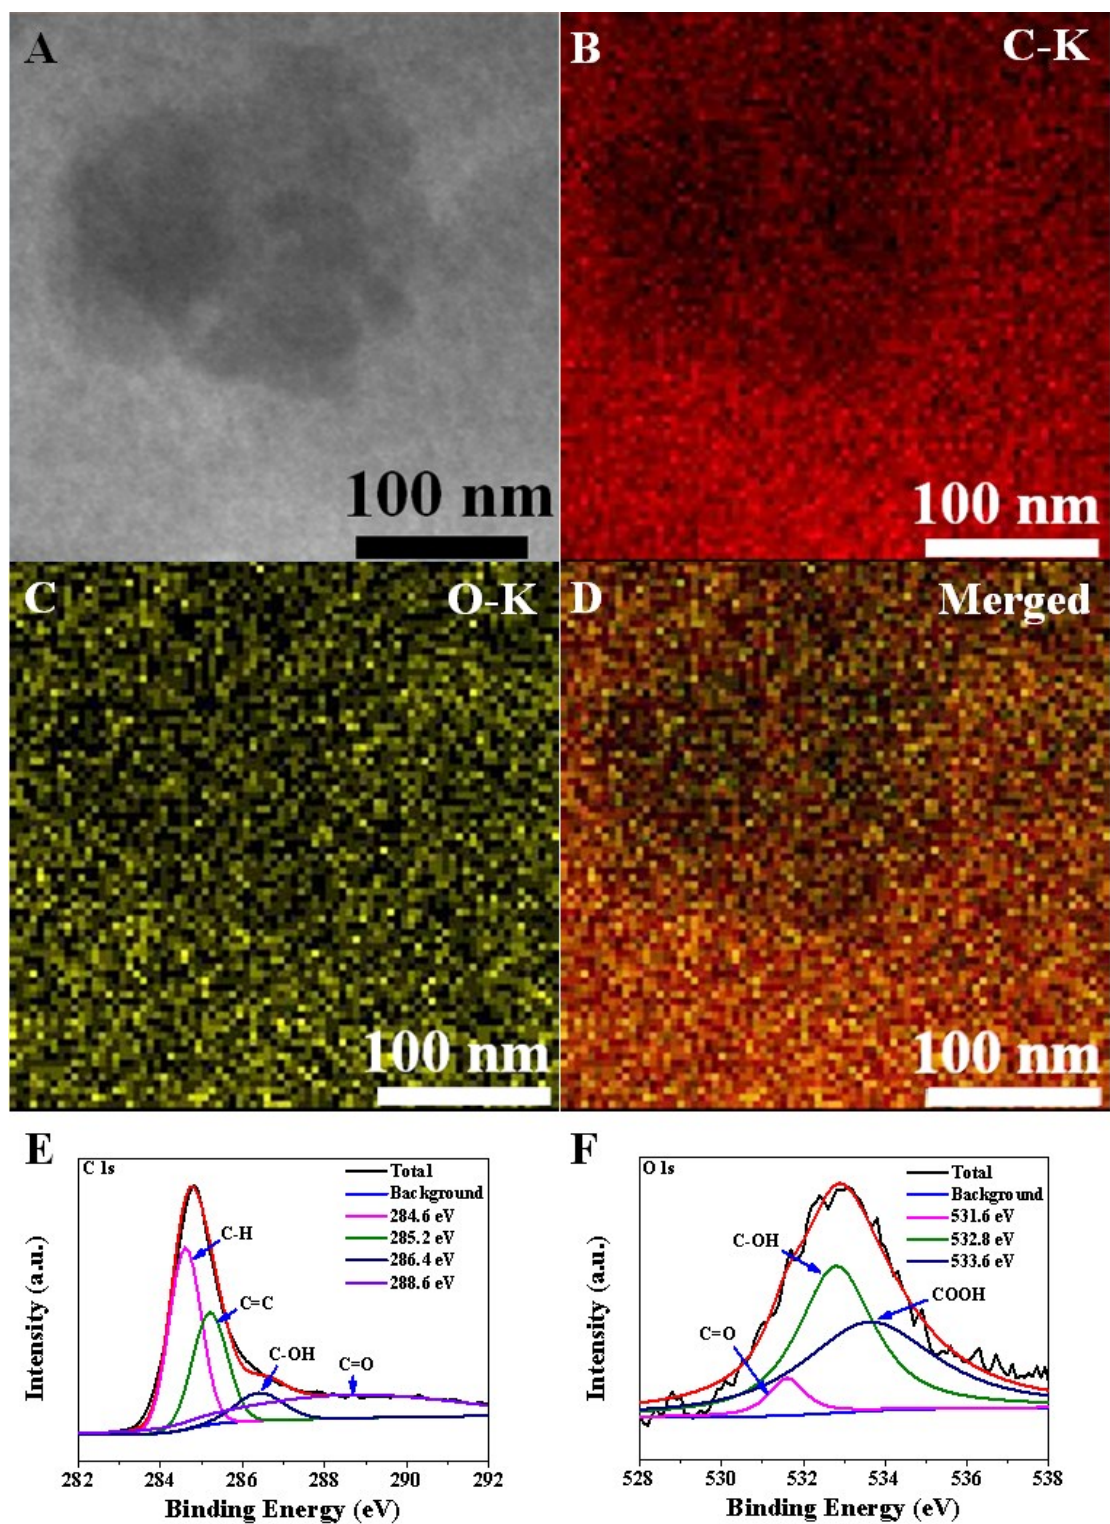

**Figure S1.** (A) TEM image of EPPC-2; Elemental mappings of (B) C, (C) O, and (D) the merged image; High-resolution spectra of (E) C 1s and (F) O 1s, respectively.

**Table S1.** List of abbreviations.

| Full Spelling                                                                 | Abbreviation |
|-------------------------------------------------------------------------------|--------------|
| specific surface area                                                         | SSA          |
| supercapacitors                                                               | SCs          |
| lithium ion batteries                                                         | LIBs         |
| symmetric supercapacitors                                                     | SSCs         |
| carbons with water pretreatment                                               | WPPC         |
| carbons with ethanol pretreatment                                             | EPPC         |
| symmetric supercapacitors with KOH as electrolyte                             | EPPC-2 SSC-1 |
| symmetric supercapacitors with Na <sub>2</sub> SO <sub>4</sub> as electrolyte | EPPC-2 SSC-2 |
| symmetric supercapacitors with EMIMBF <sub>4</sub> as electrolyte             | EPPC-2 SSC-3 |

**Table S2.** Different pre-treatment conditions, mass ratios of carbon to KOH, and calcination temperatures for the influence of BET surface areas of the obtained carbons.

| Sample | $S_{\text{BET}}$ (m <sup>2</sup> g <sup>-1</sup> ) | Pre-treatment        | Mass ratio of carbon to KOH | Calcination temperature (°C) |
|--------|----------------------------------------------------|----------------------|-----------------------------|------------------------------|
| WPPC   | 1674.8                                             | DI Water             | 1:3                         | 900                          |
| EPPC-1 | 3396.8                                             | 60% Ethanol solution | 1:3                         | 900                          |
| EPPC-2 | 3521.4                                             | 70% Ethanol solution | 1:3                         | 900                          |
| EPPC-3 | 3269.3                                             | 80% Ethanol solution | 1:3                         | 900                          |
| EPPC-4 | 3429.2                                             | 70% Ethanol solution | 1:3                         | 850                          |
| EPPC-5 | 3472.6                                             | 70% Ethanol solution | 1:3                         | 950                          |

|        |        |                      |     |     |
|--------|--------|----------------------|-----|-----|
| EPPC-6 | 3126.2 | 70% Ethanol solution | 1:2 | 900 |
| EPPC-7 | 3202.5 | 70% Ethanol solution | 1:4 | 900 |

---

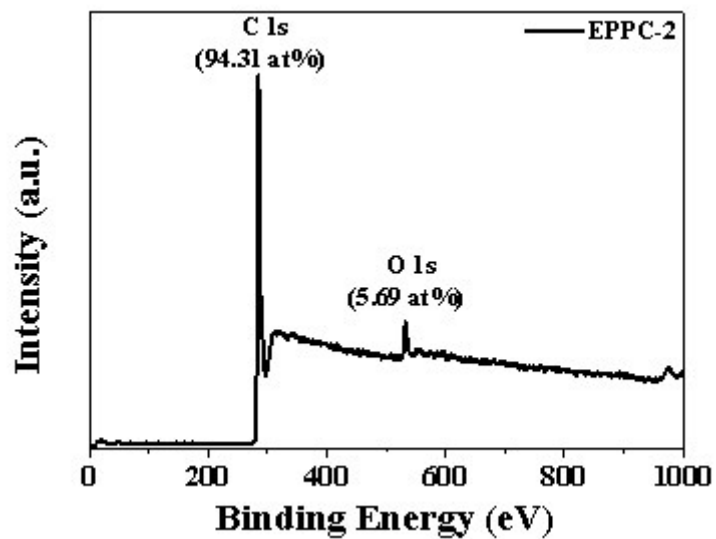

Figure S2. XPS survey profile of the EPPC-2.'

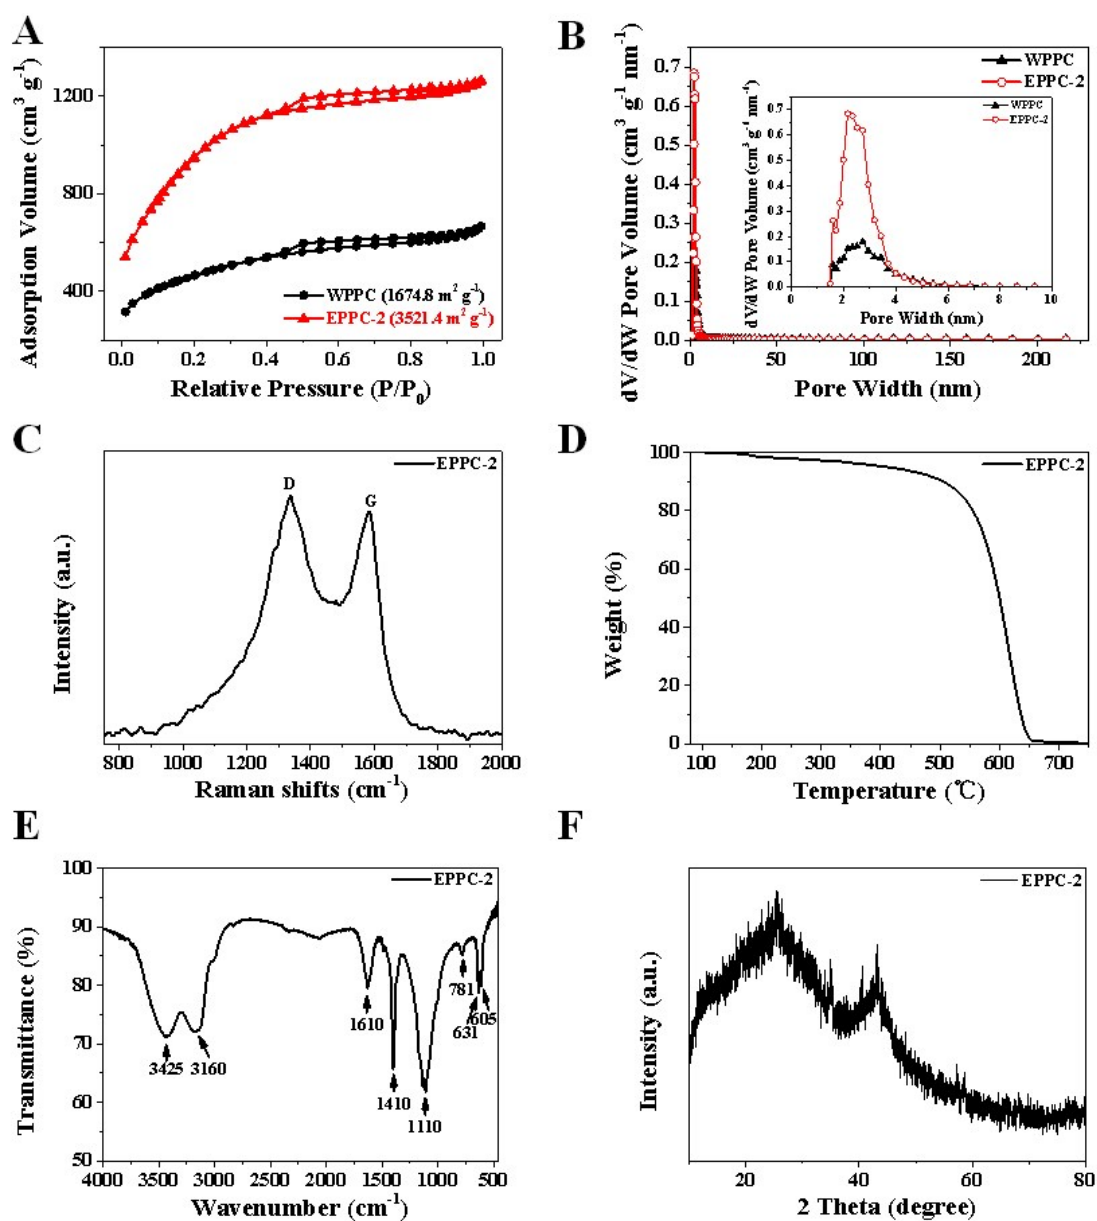

**Figure S3.** (A)  $\text{N}_2$  sorption isotherms, and (B) pore size distribution curves for WPPC and EPPC-2; (C) Raman spectra, and (D) XRD pattern of WPPC and EPPC-2; (E) FTIR spectrum, and (F) Thermogravimetric curve under air condition of EPPC-2 respectively. The insert in (B) is the enlarged size distribution of WPPC and EPPC-2 ranging from 0-10 nm.

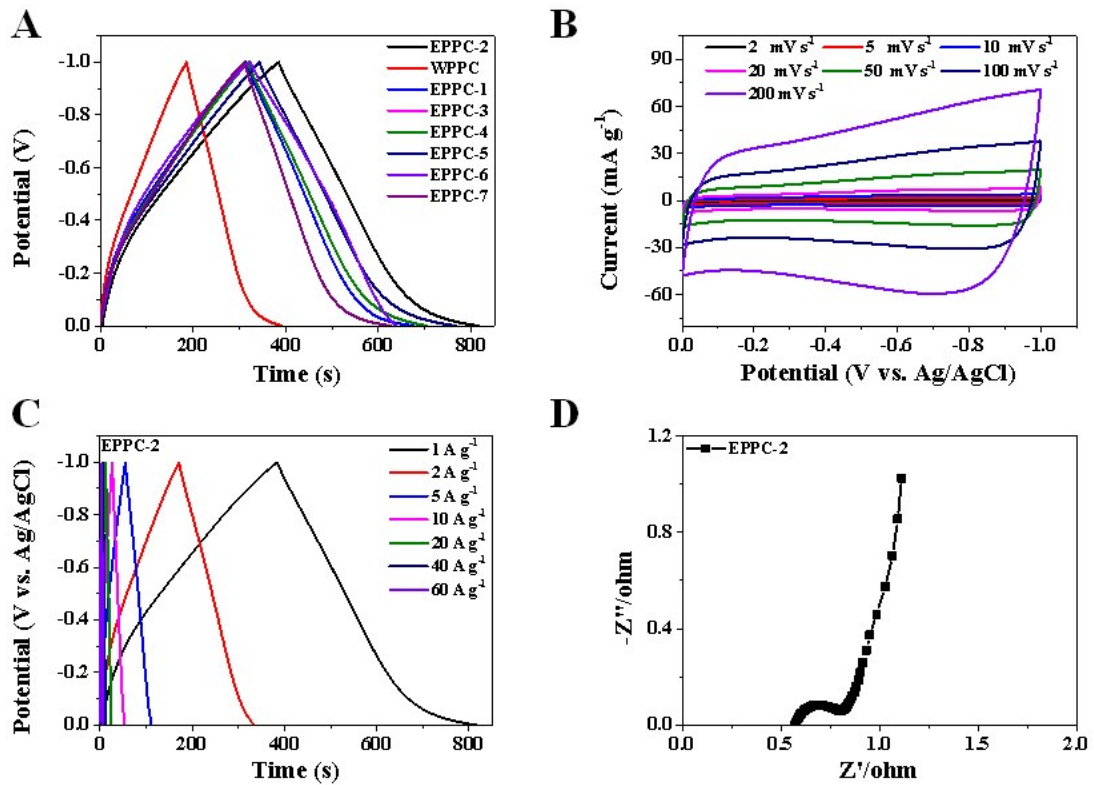

**Figure S4.** Electrochemical performance characteristics measured in a three-electrode system in the 6 M KOH electrolyte: (A) GCD curves of all samples at a current density of  $1 \text{ A} \cdot \text{g}^{-1}$ ; (B) CV curves of EPPC-2 at different scan rates; (C) GCD curves of the EPPC-2 at different current densities; and (D) Nyquist plots of EPPC-2 as the negative electrode.

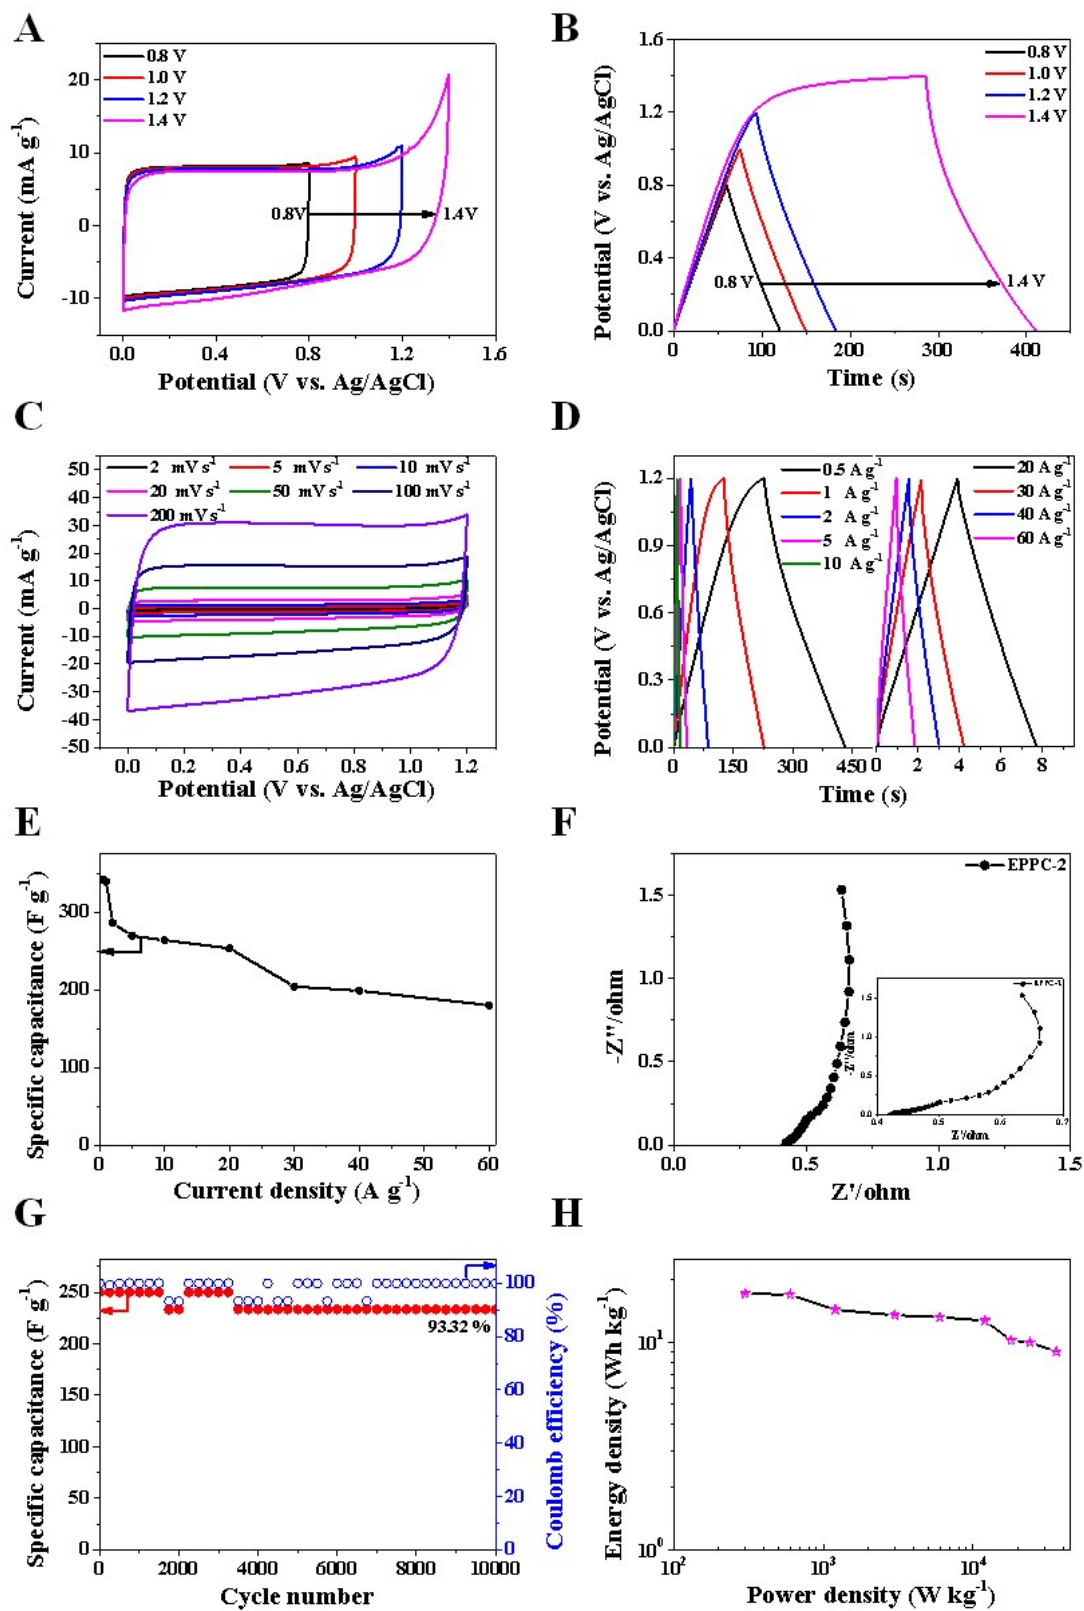

**Figure S5.** Electrochemical performance characteristics measured in a two-electrode SC in the 6 M KOH electrolyte (SSC-1): (A) CV curves of the SSC-1 operated in different voltage windows at a scan rate of  $50 \text{ mV} \cdot \text{s}^{-1}$ ; (B) GCD curves of the SSC-1 operated in different voltage windows at  $1 \text{ A} \cdot \text{g}^{-1}$ ; (C) CV



curves of the SSC-1 operated at different scan rates; (D) GCD curves of the SSC-1 operated at different current densities; (E) Specific capacitances for a single electrode at different current densities; (F) Nyquist plots of the SSC-1; (G) Cycling stability and Coulomb efficiency of the SSC-1 operated at the current density of  $10 \text{ A} \cdot \text{g}^{-1}$ ; and (H) Ragone plot of the SSC-1

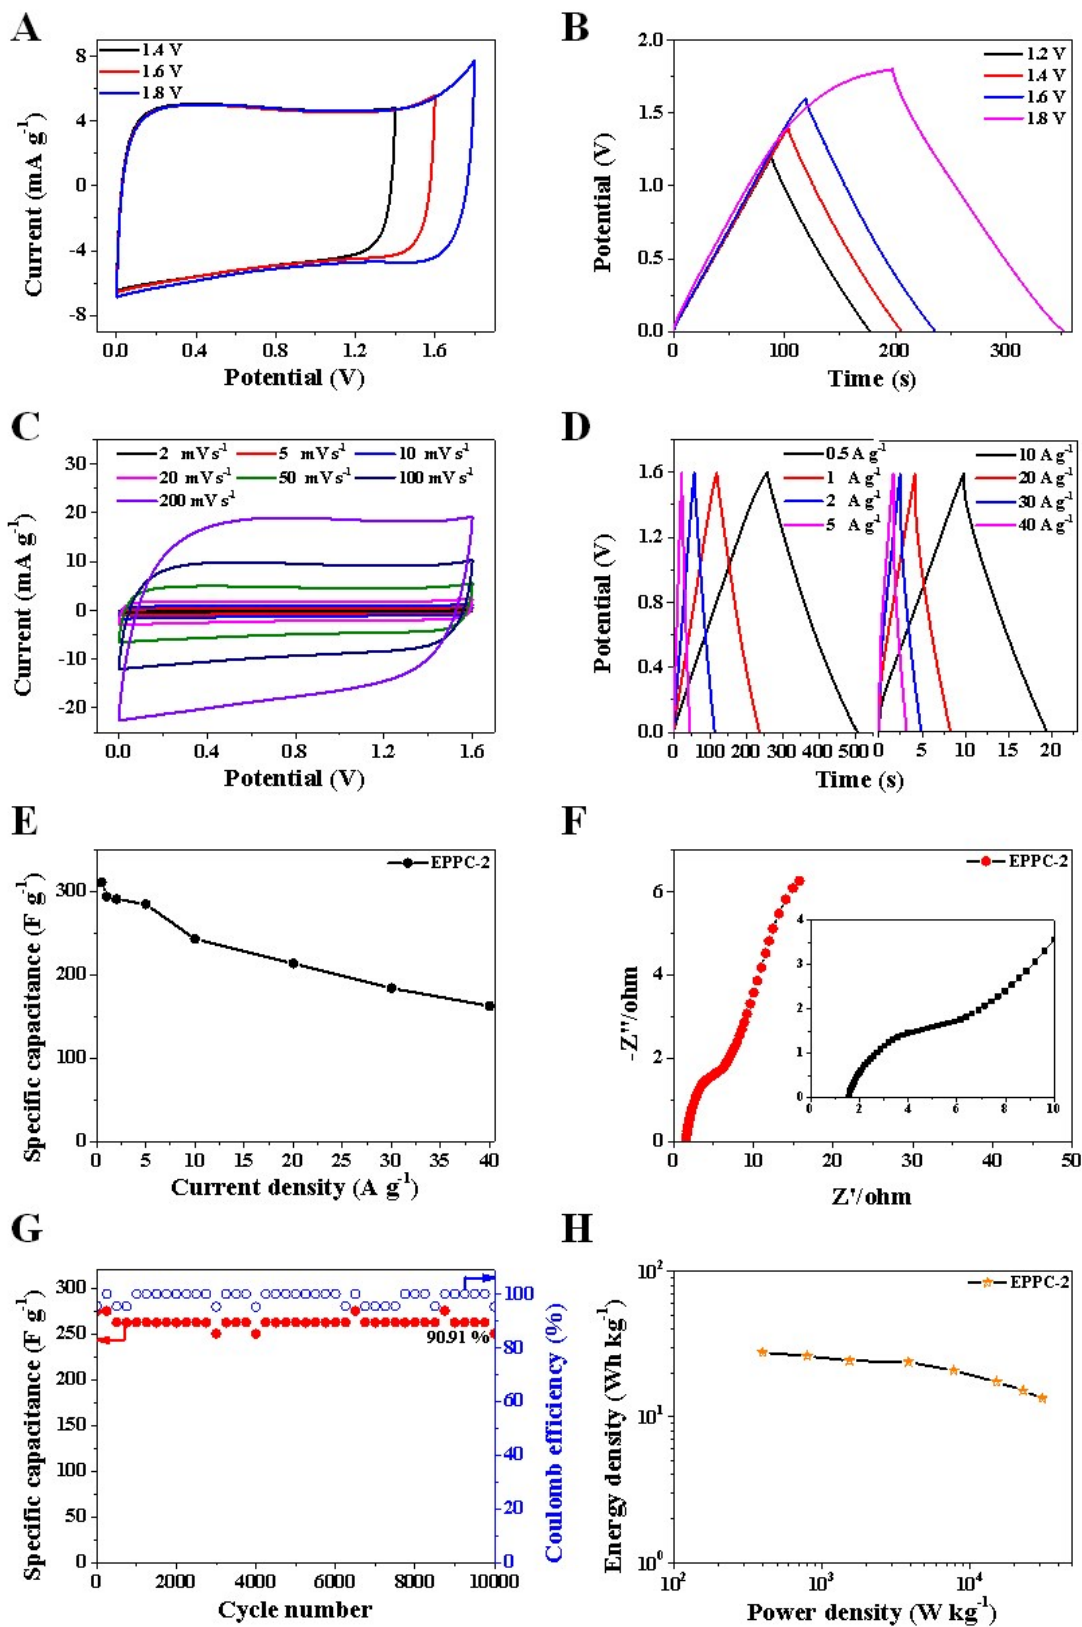

**Figure S6.** Electrochemical performance characteristics measured in a two-electrode SSC in the 1 M Na<sub>2</sub>SO<sub>4</sub> electrolyte (SSC-2): (A) CV curves of the SSC-2 operated in different voltage windows at a scan rate of 50 mV·s<sup>-1</sup>; (B) GCD curves of the SSC-2 operated in different voltage windows at 1 A·g<sup>-1</sup>; (C) CV curves of the SSC-2 operated at different scan rates; (D) GCD curves of the SSC-2 operated at different current densities; (E) Specific capacitances for a single electrode at different current densities; (F) Nyquist plots of the SSC-2; (G) Cycling stability and Coulomb efficiency of the SSC-2 operated at the current density of 5 A·g<sup>-1</sup>; and (H) Ragone plot of the SSC-2.

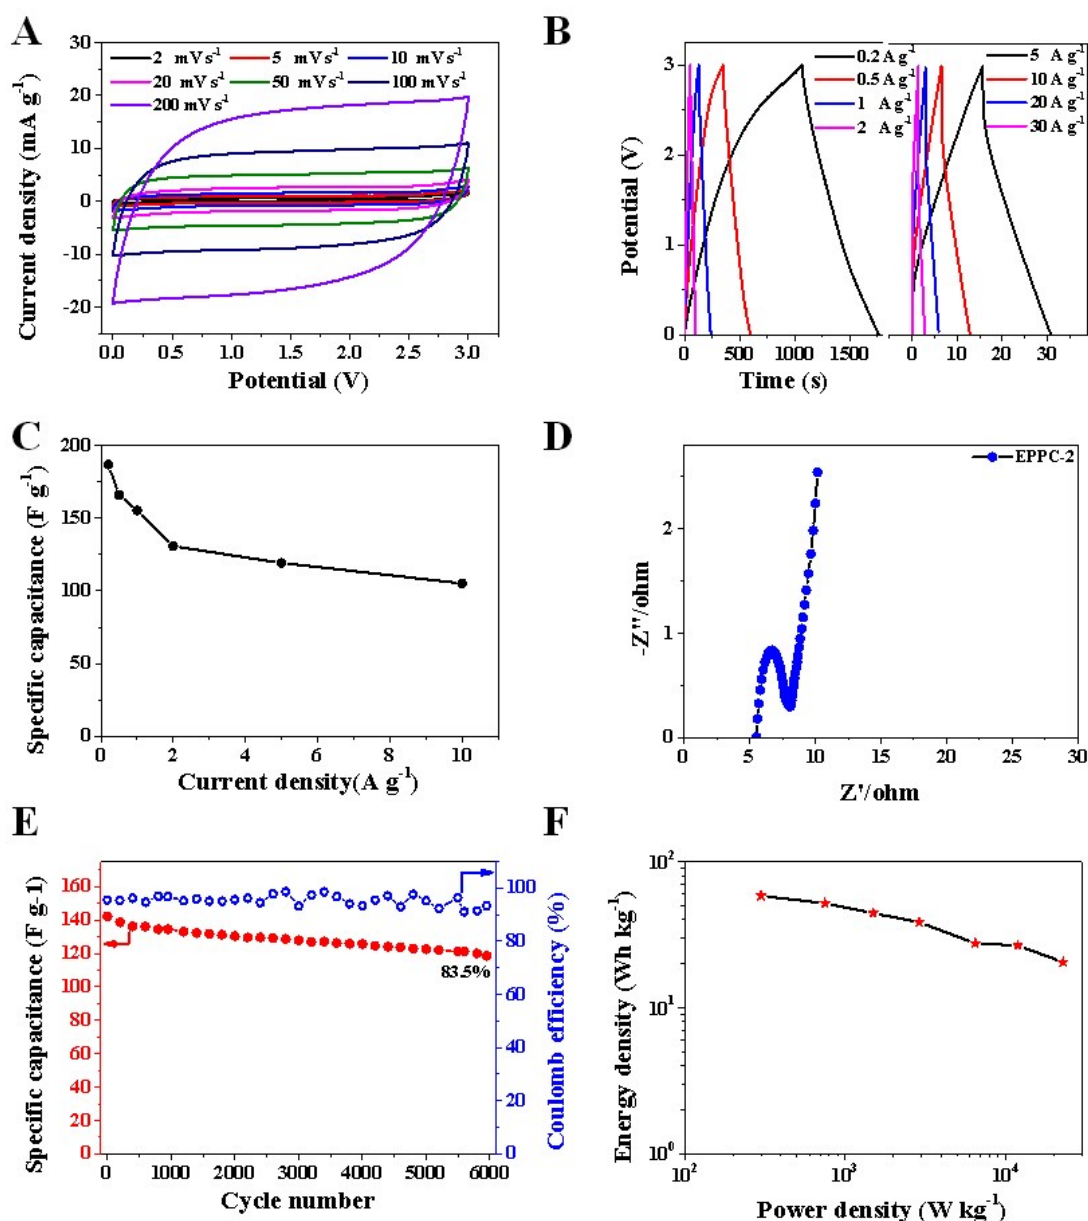

**Figure S7.** Electrochemical performance characteristics measured in a two-electrode SC in the EMIMBF<sub>4</sub> electrolyte (SSC-3): (A) CV curves of the SSC-3 operated at different scan rates; (B) GCD curves of the SSC-3 operated at different current densities; (C) Specific capacitances for a single electrode at different current densities; (D) Nyquist plots of the SSC-3; (E) Cycling stability and Coulomb efficiency

of the SSC-3 operated at the current density of 1 A·g<sup>-1</sup>; and (F) Ragone plot of the SSC-3.

**Table S3.** Supercapacitor performances of reported biomass-derived AC materials using aqueous electrolytes.

| Carbon source         | S <sub>BET</sub> (m <sup>2</sup> ·g <sup>-1</sup> ) | Test system/Electrolyte                           | Max Energy density (Wh·kg <sup>-1</sup> ) | Power density (W·kg <sup>-1</sup> ) | Ref.      |
|-----------------------|-----------------------------------------------------|---------------------------------------------------|-------------------------------------------|-------------------------------------|-----------|
| Pitaya peel           | 3521.4                                              | 2/6M KOH<br>2/1 M Na <sub>2</sub> SO <sub>4</sub> | 17.1<br>27.6                              | 300<br>400                          | This work |
| Bagasse               | 2296                                                | 2/1 M Na <sub>2</sub> SO <sub>4</sub>             | 6.25                                      | 100.5                               | 1         |
| Cotton                | 1716                                                | 2/1 M H <sub>2</sub> SO <sub>4</sub>              | 9.6                                       | 72                                  | 2         |
| Melamine              | 1570                                                | 2/6 M KOH                                         | 9.2                                       | 23                                  | 3         |
| Camellia petals       | 1122                                                | 2/6 M KOH                                         | 7.8                                       | 250                                 | 4         |
| Ground cherry calyces | 1612                                                | 2/6 M KOH                                         | 12.2                                      | 25                                  | 5         |
| Rape pollen           | 2488                                                | 2/1 M Na <sub>2</sub> SO <sub>4</sub>             | 26.8                                      | 181.4                               | 6         |
| Kraft lignin          | 1307                                                | 2/6 M KOH                                         | 8.5                                       | 100                                 | 7         |
| Phenolic resins       | 1618                                                | 2/1 M Na <sub>2</sub> SO <sub>4</sub>             | 16.97                                     | 200                                 | 8         |

**Table S4.** Supercapacitor performances of reported biomass-derived AC materials using ILs electrolytes.

| Carbon source | S <sub>BET</sub> (m <sup>2</sup> ·g <sup>-1</sup> ) | Electrolyte         | Max Energy density (Wh·kg <sup>-1</sup> ) | Power density (W·kg <sup>-1</sup> ) | Ref.      |
|---------------|-----------------------------------------------------|---------------------|-------------------------------------------|-------------------------------------|-----------|
| Pitaya peel   | 3521.4                                              | EMIMBF <sub>4</sub> | 57.7                                      | 300                                 | This work |
| Active carbon | -                                                   | EMIMBF <sub>4</sub> | 30.13                                     | 874.8                               | 9         |

|                                      |      |                                     |      |       |    |
|--------------------------------------|------|-------------------------------------|------|-------|----|
| Graphene                             | 2406 | EMIMBF <sub>4</sub>                 | 55.7 | 55.9  | 10 |
| Charcoals                            | 3270 | 1 M<br>TEABF <sub>4</sub> /AN       | 42   | 390   | 11 |
| Tobacco rods                         | 1886 | 1M Et <sub>4</sub> NBF <sub>4</sub> | 31.3 | 500   | 12 |
| Sunflower stalk                      | 1505 | Et <sub>4</sub> NBF <sub>4</sub>    | 35.7 | 989   | 13 |
| Tremella                             | 1097 | Et <sub>4</sub> NBF <sub>4</sub>    | 42.4 | 760   | 14 |
| Straw cellulose<br>waste             | 2297 | Et <sub>4</sub> NBF <sub>4</sub>    | 28.6 | 14090 | 15 |
| Sodium<br>carboxymethyl<br>cellulose | 1275 | EMIMBF <sub>4</sub>                 | 42   | 4500  | 16 |

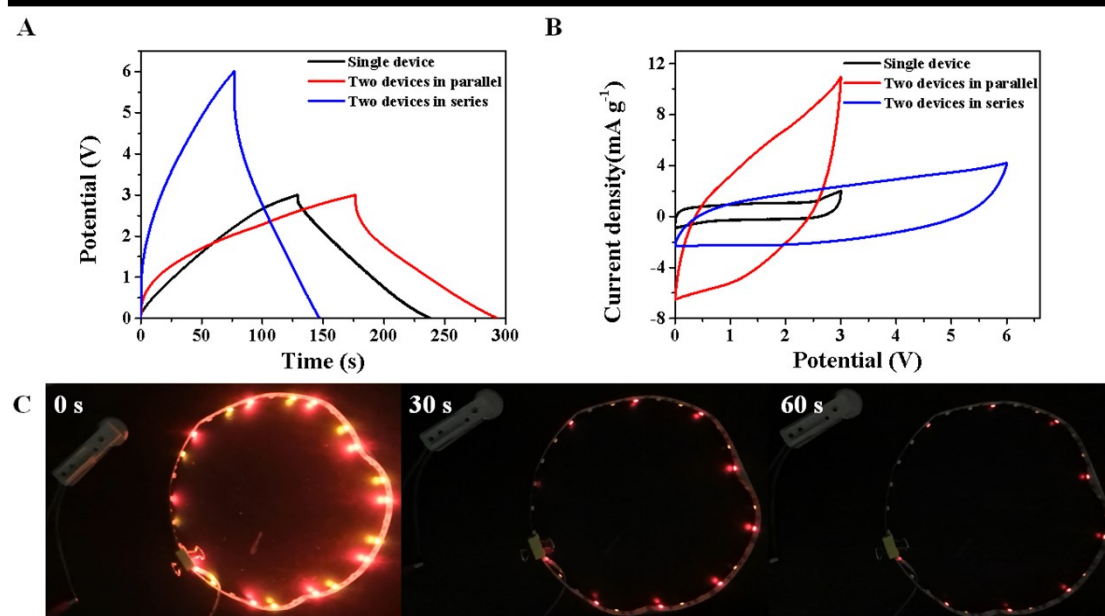

**Figure S8.** (A) GCD curves and (B) CV curves of two SSC-3 devices connected in series and in parallel, at a current density of 1 A·g<sup>-1</sup> and scan rate of 50 mV·s<sup>-1</sup>. (C) Photographs of commercial colorful LED lights with different time powered by two SSC-3 devices in series.

#### References

1. H. Feng, H. Hu, H. Dong, Y. Xiao, Y. Cai, B. Lei, Y. Liu and M. Zheng, *J Power Sources*, 2016, **302**, 164-173.
2. H. Wang, H. Yi, C. Zhu, X. Wang and H. J. Fan, *Nano Energy*, 2015, **13**, 658-669.

3. F. Sun, J. Gao, X. Pi, L. Wang, Y. Yang, Z. Qu and S. Wu, *J Power Sources*, 2017, **337**, 189-196.
4. T. Wei, X. Wei, L. Yang, H. Xiao, Y. Gao and H. Li, *J Power Sources*, 2016, **331**, 373-381.
5. D. Yu, C. Chen, G. Zhao, L. Sun, B. Du, H. Zhang, Z. Li, Y. Sun, F. Besenbacher and M. Yu, *Chemsuschem*, 2018, **11**, 1678-1685.
6. S. Liu, Y. Liang, W. Zhou, W. Hu, H. Dong, M. Zheng, H. Hu, B. Lei, Y. Xiao and Y. Liu, *J Mater Chem A*, 2018, **6**, 12046-12055.
7. F. Liu, Z. Wang, H. Zhang, L. Jin, X. Chu, B. Gu, H. Huang and W. Yang, *Carbon*, 2019, **149**, 105-116.
8. J. Guo, D. Wu, T. Wang and Y. Ma, *Applied Surface Science*, 2019, **475**, 56-66.
9. X. Zhong, J. Tang, L. Cao, W. Kong, Z. Sun, H. Cheng, Z. Lu, H. Pan and B. Xu, *Electrochim Acta*, 2017, **244**, 112-118.
10. C. Zheng, X. Zhou, H. Cao, G. Wang and Z. Liu, *J Mater Chem A*, 2015, **3**, 9543-9549.
11. D. M. Kang, Q. L. Liu, J. J. Gu, Y. S. Su, W. Zhang and D. Zhang, *Acs Nano*, 2015, **9**, 11225-11233.
12. Y.-Q. Zhao, M. Lu, P.-Y. Tao, Y.-J. Zhang, X.-T. Gong, Z. Yang, G.-Q. Zhang and H.-L. Li, *J Power Sources*, 2016, **307**, 391-400.
13. X. Wang, S. Yun, W. Fang, C. Zhang, X. Liang, Z. Lei and Z. Liu, *ACS Sustainable Chemistry & Engineering*, 2018, **6**, 11397-11407.
14. D. Chen, L. Li, Y. Xi, J. Li, M. Lu, J. Cao and W. Han, *Electrochim Acta*, 2018, **286**, 264-270.
15. Z. Chen, X. Wang, B. Xue, Q. Wei, L. Hu, Z. Wang, X. Yang and J. Qiu, *Chemsuschem*, 2019, **12**, 1390-1400.
16. D. D. Chen, Z. Q. He, M. Wang, D. Wu, X. Y. Chen and Z. J. Zhang, *J Solid State Electr*, 2020, **24**, 641-654.
